# Supplementary material
Source: publisher site journal article supplement (https://www.spandidos-publications.com/3484/downloadSupplementary)
Supplement: Supplementary file 1 [file downloadSupplementary]

## Sheet: Table SIII
Table SIII. Mutations of RHOA in digestive tract cancer cell lines
Cell line	Tissue	Status	Coding DNA	Amino acid	Zygosity	FATHMM	ClinVar
AGS	Stomach	Mutant	c.192-194del3	p.E64del	Heterozygous	NA	NA
CCK-81	Colon	Mutant	c.14G>A	p.R5Q	Heterozygous (trans configuration)	Pathogenic (score 0.99)	Likely pathogenic
			c.125A>G	p.Y42C		Pathogenic (score 0.99)	Likely pathogenic
GCIY	Stomach	Wild	-	-	-	-	-
HGC-27	Stomach	Wild	-	-	-	-	-
KATO III	Stomach	Wild	-	-	-	-	-
MKN1	Stomach	Wild	-	-	-	-	-
MKN45	Stomach	Wild	-	-	-	-	-
OE19	Esophagus	Mutant	c.125A>C	p.Y42S	Heterozygous	Pathogenic (score 1.00)	Likely pathogenic
SNU16	Stomach	Mutant	c.13C>T	p.R5W	Heterozygous	Pathogenic (score 0.92)	Likely pathogenic
			c.117T>G	p.F39L		Pathogenic (score 0.99)	NA
SNU719	Stomach	Mutant	c.182C>T	p.A61V	Heterozygous	NA	NA
SW948	Colon	Mutant	c.50G>A	p.G17E	Heterozygous	Pathogenic (score 0.99)	NA
NA, not available
